# Supplementary material for: A Rapid and Sensitive Gold Nanoparticle-Based Lateral Flow Immunoassay for Chlorantraniliprole in Agricultural and Environmental Samples
Source: MDPI journal article supplement (doi:10.3390/foods13020205), 2024-01-09
Supplement: s1 [file s1]

# **Supplementary Material**

## **A Rapid and sensitive gold nanoparticle-based lateral flow immunoassay for chlorantraniliprole in agricultural and environmental samples**

Yanling Wu <sup>a, b</sup>, Jiao Li <sup>a, b</sup>, Jie Zhu <sup>a, b</sup>, Zhaoxian Zhang <sup>c</sup>, Shuguang Zhang<sup>d</sup>, Minghua Wang<sup>a, b</sup>, Xiude Hua<sup>\*, a, b</sup>

<sup>a</sup> College of Plant Protection, Nanjing Agricultural University, Nanjing 210095, China

<sup>b</sup> State & Local Joint Engineering Research Center of Green Pesticide Invention and Application, Nanjing 210095, China

<sup>c</sup> Key Laboratory of Agri-food Safety of Anhui Province, College of Resources and Environment, Anhui Agricultural University, Hefei 230036, China

<sup>d</sup> College of Sciences, Nanjing Agricultural University, Nanjing 210095, China

\* Corresponding author. E-mail address: huaxiude@njau.edu.cn

**Table S1.** IC<sub>50</sub> of different anti-CAP mAbs by ic-ELISA

| mAb     | IC <sub>50</sub> of mAb (ng/mL) |
|---------|---------------------------------|
| 3G1D10  | 0.65                            |
| 2C12D10 | 0.67                            |
| 5C5B9   | 0.24                            |
| 3H12C8  | 10.51                           |
| 1E11E7  | 1.44                            |

**Table S2.** Cross-reactivity of analogs structurally related to CAP determined by ic-ELISA

| Compound                                                        | Structural formula                                                                  | IC <sub>50</sub> (ng/mL) | CR (%) |
|-----------------------------------------------------------------|-------------------------------------------------------------------------------------|--------------------------|--------|
| Chlorantraniliprole                                             | 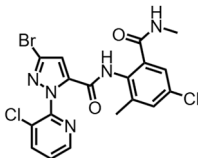   | 0.24                     | 100    |
| Cyclaniliprole                                                  |   | 69.9                     | 28.8   |
| Tetraniliprole                                                  |  | 79.8                     | 0.3    |
| Flubendiamide                                                   |  | >2000                    | <0.01  |
| Broflanilide                                                    |  | >2000                    | <0.01  |
| Benzamide                                                       |  | >2000                    | <0.01  |
| 2-(3- chlorine thiophene-2)-3- ketone amino-5- bromine pyrazole |  | >2000                    | <0.01  |

**Table S3.** The comparison of immunoassays for CAP

| Immunoassay | Format      | Sensitivity <sup>a</sup><br>(ng/mL) | Detection<br>time (min) | Reference |
|-------------|-------------|-------------------------------------|-------------------------|-----------|
| ELISA       | competitive | 1.6                                 | 135                     | [18]      |
| ELISA       | competitive | 1.5                                 | 180                     | [19]      |
| LFIA        | competitive | 2.5                                 | 15                      | [32]      |
| AuNP-LFIA   | competitive | 1.25                                | 10                      | This work |

<sup>a</sup> IC<sub>50</sub> and visible LOD are used to represent the sensitivity of ELISA and LFIA, respectively.

**Table S4.** Results of CAP residue detection by UPLC–MS/MS on spiked samples (*n* = 3).

| Spiked<br>(mg/kg) | Recovery (%) |      |       |       |      | Average<br>recovery (%) | RSD<br>(%) |
|-------------------|--------------|------|-------|-------|------|-------------------------|------------|
|                   | 1            | 2    | 3     | 4     | 5    |                         |            |
| 0.005             | 97.3         | 99.8 | 101.8 | 103.7 | 96.9 | 99.9                    | 2.7        |
| 0.02              | 101.5        | 99.6 | 91.4  | 89.9  | 91.1 | 94.6                    | 6.1        |
| 0.5               | 98.9         | 96.9 | 100.3 | 105.7 | 96.5 | 99.7                    | 3.7        |

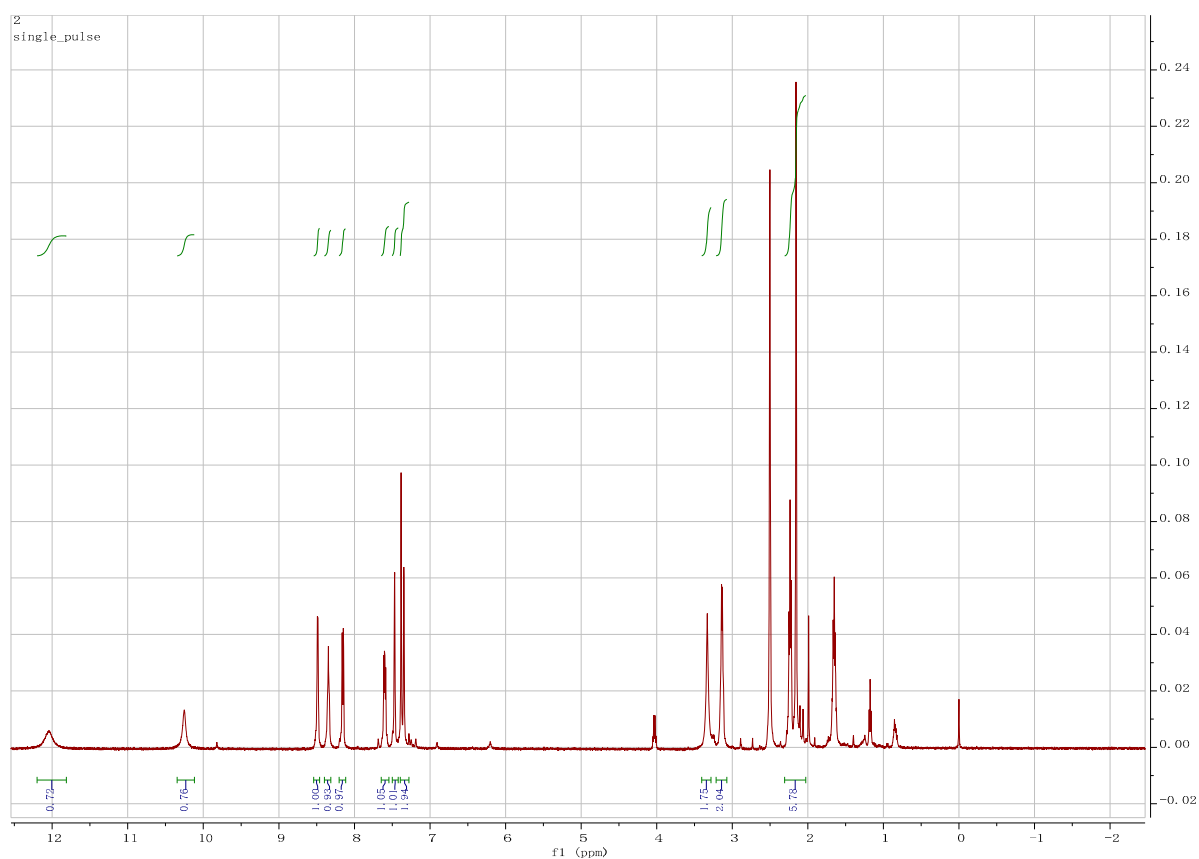

**Fig. S1.** Illustration of  $^1\text{H}$ -NMR for CAP hapten

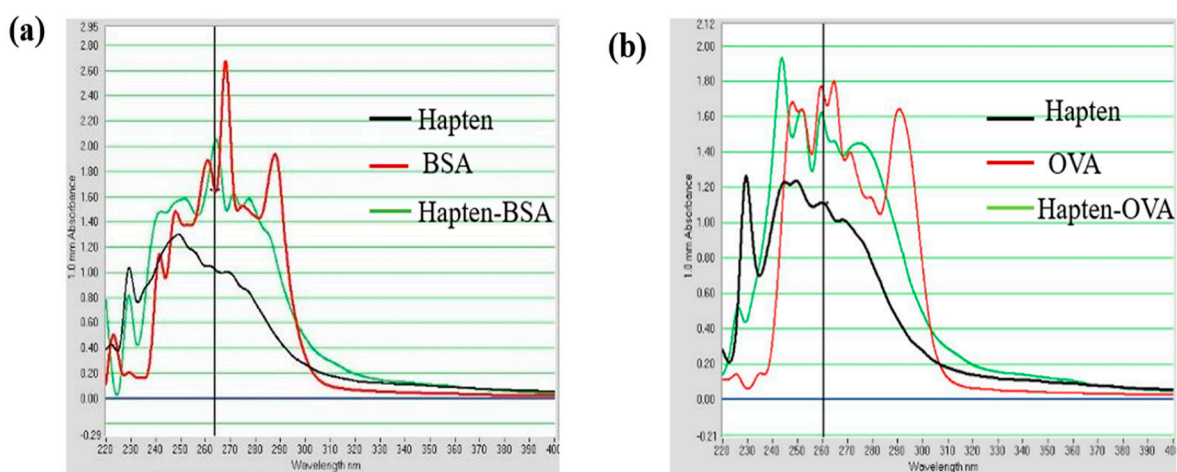

**Fig. S2.** Ultraviolet absorption spectra of (a) hapten-BSA and (b) hapten-OVA; the concentrations of hap-ten, BSA, OVA, hapten-OVA, and hapten-BSA were 5 mg/mL, 15 mg/mL, 15 mg/mL, 15 mg/mL, and 10 mg/mL, respectively

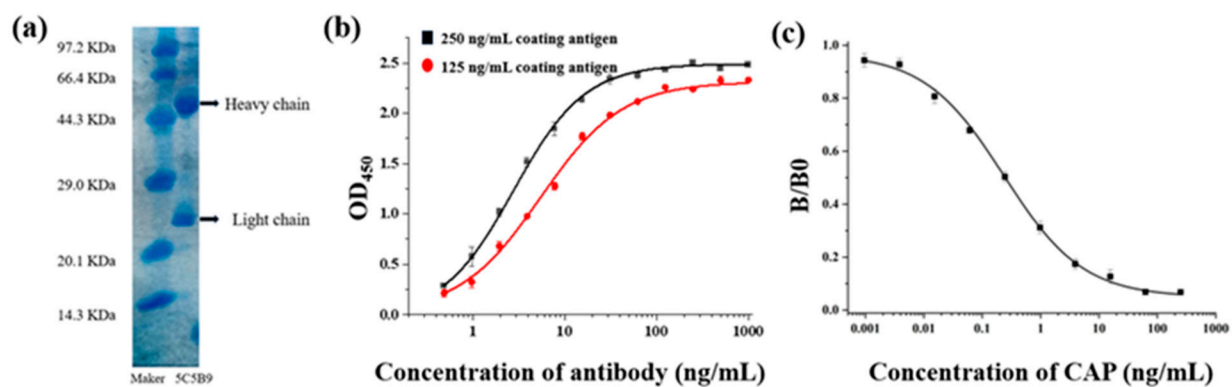

**Fig. S3.** (a) SDS-PAGE analysis of antibody 5C5B9, (b) Kaff of antibody 5C5B9 by ELISAs, and (c) standard curve of ic-ELISA for CAP

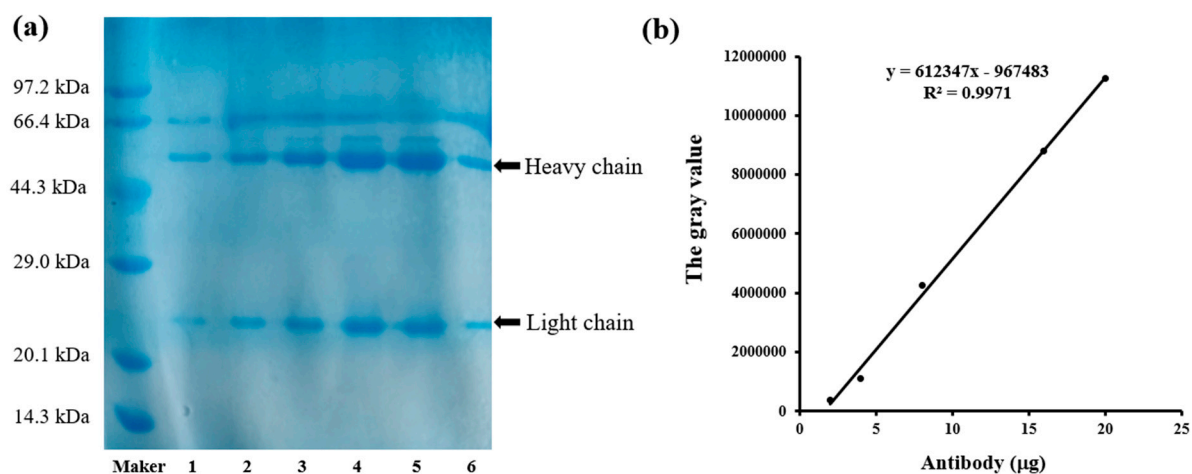

**Fig. S4.** (a) SDS-PAGE of mAb 5C5B9 and AuNP-labeled mAb; lines 1–5 loaded with 2 μg, 4 μg, 8 μg, 16 μg, and 20 μg mAb 5C5B9, and line 6 loaded with 0.54 mg AuNP-labeled mAb. (b) The standard curve representing the relationship between the gray value of the heavy chain band and the amount of antibody

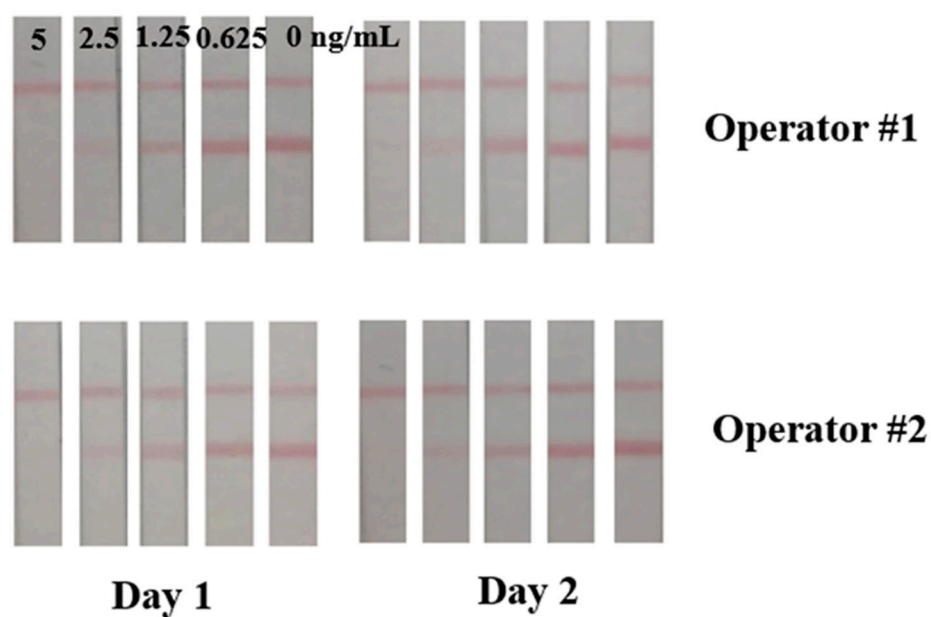

Fig. S5. The sensitivities of the AuNP-LFIA at different detection times with different operators

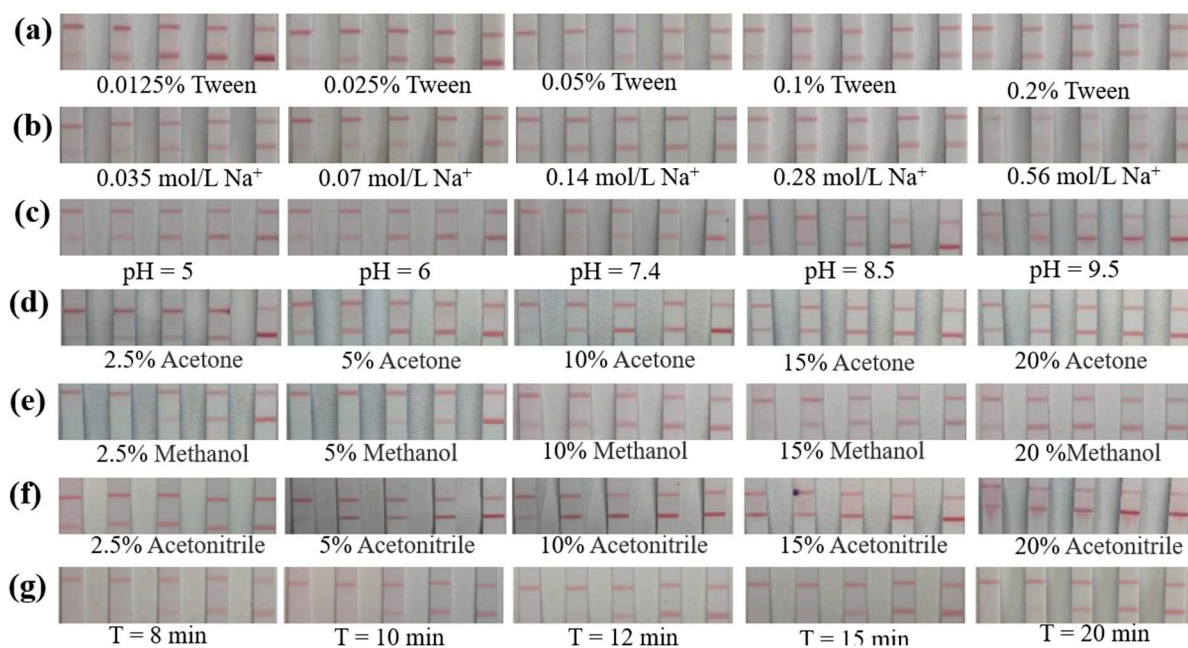

Fig. S6. Optimal parameters for the AuNP-LFIA. (a) Tween-20, (b) Na<sup>+</sup>, (c) pH, (d) methanol, (e) acetone, (f) acetonitrile, (g) time. CAP concentrations (ng/mL, from left to right): 5, 2.5, 1.25, 0.625, and 0

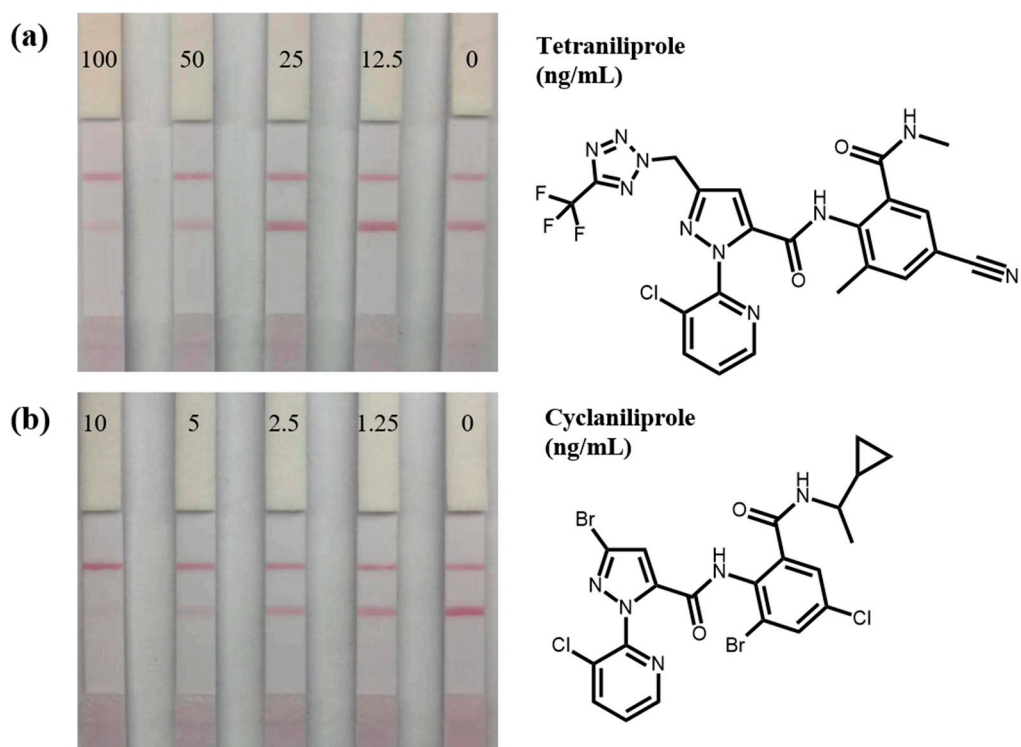

**Fig. S7.** Images of the AuNP-LFIA for serial concentrations of (a) tetraniliprole and (b) cyclaniliprole

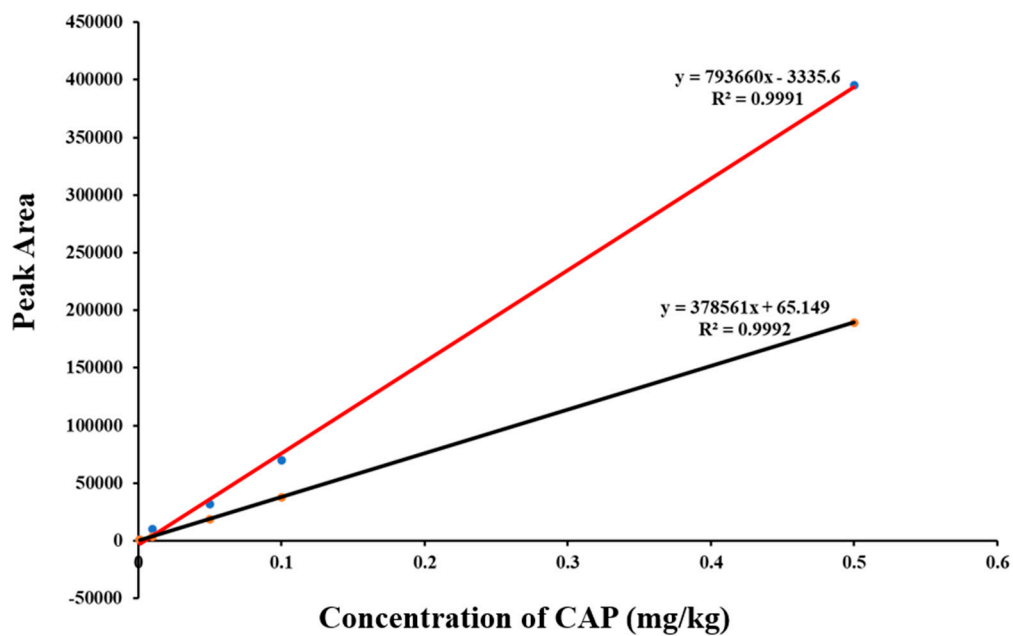

**Fig. S8.** The solvent standard curve of the solvent and matrix for CAP in brown rice detected by UPLC-MS/MS
